# Supplementary material for: SARS-CoV-2 BA.1 variant is neutralized by vaccine booster-elicited serum, but evades most convalescent serum and therapeutic antibodies
Source: PubMed Central journal article supplement (PMC8995032; doi:10.1126/scitranslmed.abn8543), 2022-04-05
Supplement: scitranslmed.abn8543_sm.pdf [file scitranslmed.abn8543_sm.pdf]

Supplementary Materials for

**SARS-CoV-2 BA.1 variant is neutralized by vaccine booster-elicited serum, but evades most convalescent serum and therapeutic antibodies**

Sabrina Lusvarghi *et al.*

Corresponding author: Carol D. Weiss, [carol.weiss@fda.hhs.gov](mailto:carol.weiss@fda.hhs.gov)

DOI: [10.1126/scitranslmed.abn8543](https://doi.org/10.1126/scitranslmed.abn8543)

**The PDF file includes:**

Tables S1 and S2

**Other Supplementary Material for this manuscript includes the following:**

MDAR Reproducibility Checklist

1 **Supplementary Materials**

2

3 **Table S1. Genotypes of severe acute respiratory syndrome coronavirus 2 (SARS-CoV-2)**  
 4 **isolated from infected individuals.**

| Sample #        | Pangolin                      | Spike Substitutions                                                       | Spike Deletions | Accession |
|-----------------|-------------------------------|---------------------------------------------------------------------------|-----------------|-----------|
|                 | <b>3.1.17</b><br>(2021-12-06) |                                                                           |                 |           |
| <b>Conv-01</b>  | AY.74                         | T19R, G142D, R158G, A222V, L452R, T478K, D614G, P681R, D950N              | E156-, F157-    | OM000262  |
| <b>Conv-02</b>  | AY.25                         | T19R, S112L, G142D, R158G, L452R, T478K, D614G, P681R, D950N              | E156-, F157-    | OM000263  |
| <b>Conv-03</b>  | AY.47                         | T19R, G142D, R158G, A222V, V289I, L452R, T478K, D614G, P681R, D950N       | E156-, F157-    | OM000264  |
| <b>Conv-04</b>  | B.1.617.2                     | T19R, K77T, G142D, R158G, G181V, L452R, T478K, D614G, A653V, P681R, D950N | E156-, F157-    | OM000265  |
| <b>Conv-05</b>  | B.1.617.2                     | T19R, K77T, G142D, R158G, G181V, L452R, T478K, D614G, A653V, P681R, D950N | E156-, F157-    | OM311576  |
| <b>Conv-06</b>  | AY.14                         | T19R, G142D, R158G, L452R, T478K, D614G, P681R, D950N                     | E156-, F157-    | OM000266  |
| <b>Conv-07</b>  | AY.14                         | T19R, G142D, R158G, L452R, T478K, D614G, P681R, D950N                     | E156-, F157-    | OM000267  |
| <b>Conv-08</b>  | AY.25                         | T19R, S112L, G142D, R158G, L452R, T478K, D614G, P681R, D950N              | E156-, F157-    | OM000268  |
| <b>Conv-09</b>  | B.1.617.2                     | T19R, T95I, G142D, R158G, L452R, T478K, D614G, P681R, D950N, G1124V       | E156-, F157-    | OM000269  |
| <b>Conv-10</b>  | AY.62                         | T19R, G142D, R158G, A222V, L452R, T478K, D614G, P681R, G946V, D950N       | E156-, F157-    | OM000270  |
| <b>Conv-11</b>  | AY.25                         | T19R, G142D, R158G, L452R, T478K, D614G, P681R, D950N                     | E156-, F157-    | OM000271  |
| <b>Conv-12</b>  | AY.44                         | T19R, T22I, G142D, R158G, L452R, T478K, D614G, P681R, D950N               | E156-, F157-    | OM000272  |
| <b>Conv-13</b>  | AY.119                        | T19R, T95I, G142D, R158G, L452R, T478K, D614G, P681R, D950N               | E156-, F157-    | OM000273  |
| <b>Conv-14</b>  | B.1.617.2                     | T19R, G142D, R158G, L452R, T478K, D614G, P681R, D950N                     | E156-, F157-    | OM000274  |
| <b>Conv-16</b>  | B.1.617.2                     | T19R, T95I, G142D, R158G, L452R, T478K, D614G, P681R, D950N               | E156-, F157-    | OM000276  |
| <b>Conv-18*</b> | B.1.351                       |                                                                           |                 |           |
| <b>Conv-19</b>  | B.1.351                       | D80A, D215G, K417N, E484K, N501Y, D614G, A701V                            |                 | OM000278  |
| <b>Conv-20</b>  | B.1                           | D614G                                                                     |                 | OM000279  |
| <b>Conv-21</b>  | B.1                           | D614G                                                                     |                 | OM000280  |

|                |         |                                                             |                      |          |
|----------------|---------|-------------------------------------------------------------|----------------------|----------|
| <b>Conv-22</b> | B.1     | D614G                                                       |                      | OM000281 |
| <b>Conv-23</b> | B.1     | D614G                                                       |                      | OM000282 |
| <b>Conv-24</b> | B.1     | D614G                                                       |                      | OM000283 |
| <b>Conv-25</b> | B.1     | D614G                                                       |                      | OM000284 |
| <b>Conv-26</b> | B.1     | D614G                                                       |                      | OM000285 |
| <b>Conv-27</b> | B.1     | D614G                                                       |                      | OM000286 |
| <b>Conv-28</b> | B.1     | D614G                                                       |                      | OM000287 |
| <b>Conv-29</b> | B.1     | D614G                                                       |                      | OM000288 |
| <b>Conv-30</b> | B.1.1.7 | N501Y, A570D, D614G, P681H,<br>T716I, S982A, D1118H         | H69-, V70-,<br>Y144- | OM000289 |
| <b>Conv-31</b> | B.1.1.7 | N501Y, A570D, D614G, P681H,<br>T716I, S982A, D1118H         | H69-, V70-,<br>Y144- | OM000290 |
| <b>Conv-32</b> | B.1.1.7 | N501Y, A570D, D614G, P681H,<br>T716I, S982A, D1118H, K1191N | H69-, V70-,<br>Y144- | OM000291 |
| <b>Conv-33</b> | B.1.1.7 | N501Y, A570D, D614G, P681H,<br>T716I, S982A, D1118H         | H69-, V70-,<br>Y144- | OM000292 |
| <b>Conv-35</b> | B.1.2   | D614G                                                       |                      | OM000294 |
| <b>Conv-36</b> | B.1.2   | G257D, D614G                                                |                      | OM000295 |
| <b>Conv-37</b> | B.1.2   | D614G                                                       |                      | OM000296 |
| <b>Conv-38</b> | B.1.2   | D614G                                                       |                      | OM000297 |
| <b>Conv-39</b> | B.1.2   | D614G                                                       |                      | OM000298 |
| <b>Conv-40</b> | B.1.2   | D614G                                                       |                      | OM000299 |

5 \*The SARS-CoV-2 sequence information from this individual was not available.

6

7

8 **Table S2. NT<sub>50</sub> values for each convalescent serum sample against D614G, Delta, and**  
 9 **Omicron.**

| Sample # | Variant   | D614G   |        | Delta   |         | Omicron |       |
|----------|-----------|---------|--------|---------|---------|---------|-------|
|          |           | Mean    | SD     | Mean    | SD      | Mean*   | SD    |
| Conv-20  | B.1       | 1626.5  | 213.7  | 6135.0  | 654.8   | 259.4   | 16.0  |
| Conv-21  | B.1       | 2333.3  | 355.9  | 1717.5  | 682.4   | 20.0    |       |
| Conv-22  | B.1       | 392.4   | 67.3   | 267.0   | 58.4    | 20.0    |       |
| Conv-23  | B.1       | 1121.4  | 415.9  | 95.1    | 32.5    | 20.0    |       |
| Conv-24  | B.1       | 177.1   | 36.6   | 174.6   | 26.4    | 20.0    |       |
| Conv-25  | B.1       | 2781.2  | 885.0  | 3068.0  | 502.0   | 72.0    | 14.6  |
| Conv-26  | B.1       | 2116.5  | 473.0  | 2602.5  | 415.1   | 20.0    |       |
| Conv-27  | B.1       | 80.5    | 24.2   | 34.5    | 20.5    | 20.0    |       |
| Conv-28  | B.1       | 1849.8  | 320.6  | 122.3   | 16.2    | 20.0    |       |
| Conv-29  | B.1       | 92.2    | 28.5   | 20.0    |         | 20.0    |       |
| Conv-35  | B.1.2     | 393.9   | 92.2   | 1384.2  | 523.5   | 20.0    |       |
| Conv-36  | B.1.2     | 3375.0  | 807.0  | 1890.0  | 8.5     | 20.0    |       |
| Conv-37  | B.1.2     | 1012.5  | 137.6  | 675.1   | 199.2   | 20.0    |       |
| Conv-38  | B.1.2     | 1484.3  | 145.3  | 399.1   | 28.2    | 20.0    |       |
| Conv-39  | B.1.2     | 427.0   | 68.3   | 458.7   | 143.0   | 20.0    |       |
| Conv-40  | B.1.2     | 226.4   | 36.9   | 452.1   | 77.6    | 20.0    |       |
| Conv-30  | B.1.1.7   | 1191.3  | 168.4  | 472.2   | 206.0   | 20.0    |       |
| Conv-31  | B.1.1.7   | 37112.2 | 8284.0 | 13937.5 | 2715.9  | 100.0   | 17.9  |
| Conv-32  | B.1.1.7   | 10178.0 | 2532.0 | 6054.5  | 1967.4  | 20.0    |       |
| Conv-33  | B.1.1.7   | 369.6   | 89.6   | 412.9   | 174.1   | 20.0    |       |
| Conv-18  | B.1.351   | 166.2   | 33.7   | 94.1    | 22.6    | 61.3    | 15.6  |
| Conv-19  | B.1.351   | 1110.5  | 249.3  | 852.7   | 242.0   | 189.2   | 31.7  |
| Conv-4   | B.1.617.2 | 42.0    | 2.4    | 130.4   | 4.5     | 20.0    |       |
| Conv-5   | B.1.617.2 | 610.0   | 76.4   | 1389.5  | 364.2   | 65.7    | 6.7   |
| Conv-9   | B.1.617.2 | 176.0   | 7.3    | 2217.0  | 165.5   | 57.6    | 10.8  |
| Conv-14  | B.1.617.2 | 1250.0  | 35.4   | 64680.5 | 2305.9  | 381.7   | 55.0  |
| Conv-16  | B.1.617.2 | 20533.7 | 4313.7 | 14482.0 | 1968.6  | 224.1   | 28.0  |
| Conv-1   | AY.74     | 322.6   | 44.5   | 8303.0  | 2190.6  | 61.2    | 19.4  |
| Conv-2   | AY.25     | 2368.5  | 67.2   | 58860.0 | 19859.8 | 1713.0  | 217.8 |
| Conv-3   | AY.47     | 8832.5  | 1451.7 | 44544.5 | 9013.5  | 299.8   | 29.6  |
| Conv-6   | AY.14     | 303.4   | 44.4   | 13762.5 | 1501.2  | 31.2    | 15.9  |
| Conv-7   | AY.14     | 129.2   | 29.4   | 640.5   | 30.5    | 20.0    |       |
| Conv-8   | AY.25     | 1195.0  | 15.6   | 7733.0  | 553.0   | 126.4   | 5.7   |

|                |               |        |       |         |        |        |        |
|----------------|---------------|--------|-------|---------|--------|--------|--------|
| <b>Conv-10</b> | <b>AY.62</b>  | 1594.0 | 202.2 | 31861.0 | 6280.5 | 81.5   | 8.8    |
| <b>Conv-11</b> | <b>AY.25</b>  | 160.6  | 2.6   | 1950.5  | 299.1  | 72.1   | 14.5   |
| <b>Conv-12</b> | <b>AY.44</b>  | 2520.0 | 383.3 | 24904.5 | 4666.2 | 1921.0 | 1189.4 |
| <b>Conv-13</b> | <b>AY.119</b> | 1260.0 | 164.0 | 22082.5 | 6200.6 | 344.0  | 61.3   |

10 \*Titers below the lowest dilution tested (1:40 dilution) were set as 20. NT<sub>50</sub> = 50%

11 neutralization titer. SD standard deviation.

12
